# Supplementary material for: The role of pressure and friction forces in automated insertion of cochlear implants
Source: Front Neurol. 2024 Aug 6;15:1430694. doi: 10.3389/fneur.2024.1430694 (PMC11337231; doi:10.3389/fneur.2024.1430694)
Supplement: Supplementary file 1 [file Table_1.XLSX]

## Sheet: Tabelle1
f											f_1:9
	1% SDS,open,v=0.125	5% SDS,open,v=0.125	10% SDS,open,v=0.125	1% SDS,closed,v=0.125	5% SDS,closed,v=0.125	10% SDS,closed,v=0.125						10% SDS,open,v=0.125	10% SDS,open,v=0.25	10% SDS,open,v=0.5	10% SDS,open,v=1.0	10% SDS,open,v=2.0	10% SDS,closed,v=0.125	10% SDS,closed,v=0.25	10% SDS,closed,v=0.5	10% SDS,closed,v=1.0	10% SDS,closed,v=2.0
1% SDS,open,v=0.125		0.999997	0.999998	1.43731e-10	0.00366618	0.999997					10% SDS,open,v=0.125		0.99992	0.530945	0.085712	0.00693387	0.999998	0.999998	0.95669	0.265759	0.046278
5% SDS,open,v=0.125	0.999997		0.999998	3.88771e-07	0.17996	0.999998					10% SDS,open,v=0.25	0.99992		0.999955	0.947912	0.513796	0.993228	0.999998	0.999998	0.997283	0.875576
10% SDS,open,v=0.125	0.999998	0.999998		4.13657e-08	0.0668865	0.999998					10% SDS,open,v=0.5	0.530945	0.999955		0.999998	0.999894	0.228935	0.85665	0.999998	0.999998	0.999998
1% SDS,closed,v=0.125	1.43731e-10	3.88771e-07	4.13657e-08		0.564404	6.55962e-07					10% SDS,open,v=1.0	0.085712	0.947912	0.999998		0.999998	0.0202895	0.283325	0.999874	0.999998	0.999998
5% SDS,closed,v=0.125	0.00366618	0.17996	0.0668865	0.564404		0.221848					10% SDS,open,v=2.0	0.00693387	0.513796	0.999894	0.999998		0.00109272	0.0379533	0.949097	0.999997	0.999998
10% SDS,closed,v=0.125	0.999997	0.999998	0.999998	6.55962e-07	0.221848						10% SDS,closed,v=0.125	0.999998	0.993228	0.228935	0.0202895	0.00109272		0.999998	0.75669	0.0849395	0.00970794
											10% SDS,closed,v=0.25	0.999998	0.999998	0.85665	0.283325	0.0379533	0.999998		0.998504	0.603352	0.178177
	1% SDS,open,v=0.25	5% SDS,open,v=0.25	10% SDS,open,v=0.25	1% SDS,closed,v=0.25	5% SDS,closed,v=0.25	10% SDS,closed,v=0.25					10% SDS,closed,v=0.5	0.95669	0.999998	0.999998	0.999874	0.949097	0.75669	0.998504		0.999998	0.998869
1% SDS,open,v=0.25		0.99948	0.999998	4.66539e-07	0.716073	0.999998					10% SDS,closed,v=1.0	0.265759	0.997283	0.999998	0.999998	0.999997	0.0849395	0.603352	0.999998		0.999998
5% SDS,open,v=0.25	0.99948		0.982342	0.00259211	0.999998	0.999998					10% SDS,closed,v=2.0	0.046278	0.875576	0.999998	0.999998	0.999998	0.00970794	0.178177	0.998869	0.999998
10% SDS,open,v=0.25	0.999998	0.982342		3.3218e-08	0.396701	0.999998					f_1:19
1% SDS,closed,v=0.25	4.66539e-07	0.00259211	3.3218e-08		0.115125	1.7329e-05						5% SDS,open,v=0.125	5% SDS,open,v=0.25	5% SDS,open,v=0.5	5% SDS,open,v=1.0	5% SDS,open,v=2.0	5% SDS,closed,v=0.125	5% SDS,closed,v=0.25	5% SDS,closed,v=0.5	5% SDS,closed,v=1.0	5% SDS,closed,v=2.0
5% SDS,closed,v=0.25	0.716073	0.999998	0.396701	0.115125		0.979862					5% SDS,open,v=0.125		0.999998	0.999998	0.739671	0.104315	0.17996	0.999995	0.999998	0.900818	0.302628
10% SDS,closed,v=0.25	0.999998	0.999998	0.999998	1.7329e-05	0.979862						5% SDS,open,v=0.25	0.999998		0.999996	0.572001	0.0533392	0.300466	0.999998	0.999998	0.783294	0.181504
											5% SDS,open,v=0.5	0.999998	0.999996		0.999567	0.763313	0.00555566	0.929324	0.999998	0.999988	0.95655
	1% SDS,open,v=0.5	5% SDS,open,v=0.5	10% SDS,open,v=0.5	1% SDS,closed,v=0.5	5% SDS,closed,v=0.5	10% SDS,closed,v=0.5					5% SDS,open,v=1.0	0.739671	0.572001	0.999567		0.999998	1.55894e-06	0.0452468	0.975078	0.999998	0.999998
1% SDS,open,v=0.5		0.999333	0.999998	1.64552e-06	0.968448	0.999998					5% SDS,open,v=2.0	0.104315	0.0533392	0.763313	0.999998		2.16883e-09	0.000841615	0.393565	0.999994	0.999998
5% SDS,open,v=0.5	0.999333		0.946679	0.00676845	0.999998	0.999881					5% SDS,closed,v=0.125	0.17996	0.300466	0.00555566	1.55894e-06	2.16883e-09		0.959442	0.0340236	8.00977e-06	4.06911e-08
10% SDS,open,v=0.5	0.999998	0.946679		4.33435e-08	0.692856	0.999998					5% SDS,closed,v=0.25	0.999995	0.999998	0.929324	0.0452468	0.000841615	0.959442		0.997009	0.108575	0.00527352
1% SDS,closed,v=0.5	1.64552e-06	0.00676845	4.33435e-08		0.0401675	3.93377e-06					5% SDS,closed,v=0.5	0.999998	0.999998	0.999998	0.975078	0.393565	0.0340236	0.997009		0.996898	0.721877
5% SDS,closed,v=0.5	0.968448	0.999998	0.692856	0.0401675		0.98782					5% SDS,closed,v=1.0	0.900818	0.783294	0.999988	0.999998	0.999994	8.00977e-06	0.108575	0.996898		0.999998
10% SDS,closed,v=0.5	0.999998	0.999881	0.999998	3.93377e-06	0.98782						5% SDS,closed,v=2.0	0.302628	0.181504	0.95655	0.999998	0.999998	4.06911e-08	0.00527352	0.721877	0.999998
											f_1:99
	1% SDS,open,v=1.0	5% SDS,open,v=1.0	10% SDS,open,v=1.0	1% SDS,closed,v=1.0	5% SDS,closed,v=1.0	10% SDS,closed,v=1.0						1% SDS,open,v=0.125	1% SDS,open,v=0.25	1% SDS,open,v=0.5	1% SDS,open,v=1.0	1% SDS,open,v=2.0	1% SDS,closed,v=0.125	1% SDS,closed,v=0.25	1% SDS,closed,v=0.5	1% SDS,closed,v=1.0	1% SDS,closed,v=2.0
1% SDS,open,v=1.0		0.999965	0.999998	0.0526985	0.998985	0.999998					1% SDS,open,v=0.125		0.999998	0.999785	0.514048	0.0401906	1.43731e-10	2.69663e-06	0.00449346	0.999998	0.999991
5% SDS,open,v=1.0	0.999965		0.99997	0.864181	0.999998	0.999998					1% SDS,open,v=0.25	0.999998		0.999995	0.740084	0.100544	1.41017e-11	4.66539e-07	0.00127673	0.999996	0.999998
10% SDS,open,v=1.0	0.999998	0.99997		0.0546145	0.999093	0.999998					1% SDS,open,v=0.5	0.999785	0.999995		0.999979	0.892418	1.12313e-16	5.99034e-11	1.64552e-06	0.843203	0.999998
1% SDS,closed,v=1.0	0.0526985	0.864181	0.0546145		0.963021	0.188322					1% SDS,open,v=1.0	0.514048	0.740084	0.999979		0.999998	0	2.29117e-16	1.28795e-10	0.0526985	0.999532
5% SDS,closed,v=1.0	0.998985	0.999998	0.999093	0.963021		0.999995					1% SDS,open,v=2.0	0.0401906	0.100544	0.892418	0.999998		0	0	2.23577e-14	0.000979685	0.74935
10% SDS,closed,v=1.0	0.999998	0.999998	0.999998	0.188322	0.999995						1% SDS,closed,v=0.125	1.43731e-10	1.41017e-11	1.12313e-16	0	0		0.999948	0.525336	1.06966e-07	1.37708e-15
											1% SDS,closed,v=0.25	2.69663e-06	4.66539e-07	5.99034e-11	2.29117e-16	0	0.999948		0.999924	0.000381444	4.10999e-10
	1% SDS,open,v=2.0	5% SDS,open,v=2.0	10% SDS,open,v=2.0	1% SDS,closed,v=2.0	5% SDS,closed,v=2.0	10% SDS,closed,v=2.0					1% SDS,closed,v=0.5	0.00449346	0.00127673	1.64552e-06	1.28795e-10	2.23577e-14	0.525336	0.999924		0.118919	6.98026e-06
1% SDS,open,v=2.0		0.999958	0.999998	0.74935	0.995827	0.999998					1% SDS,closed,v=1.0	0.999998	0.999996	0.843203	0.0526985	0.000979685	1.06966e-07	0.000381444	0.118919		0.945496
5% SDS,open,v=2.0	0.999958		0.999997	0.999997	0.999998	0.999998					1% SDS,closed,v=2.0	0.999991	0.999998	0.999998	0.999532	0.74935	1.37708e-15	4.10999e-10	6.98026e-06	0.945496
10% SDS,open,v=2.0	0.999998	0.999997		0.917667	0.999828	0.999998
1% SDS,closed,v=2.0	0.74935	0.999997	0.917667		0.999998	0.997087
5% SDS,closed,v=2.0	0.995827	0.999998	0.999828	0.999998		0.999998
10% SDS,closed,v=2.0	0.999998	0.999998	0.999998	0.997087	0.999998
w											w_1:9
	1% SDS,open,v=0.125	5% SDS,open,v=0.125	10% SDS,open,v=0.125	1% SDS,closed,v=0.125	5% SDS,closed,v=0.125	10% SDS,closed,v=0.125						10% SDS,open,v=0.125	10% SDS,open,v=0.25	10% SDS,open,v=0.5	10% SDS,open,v=1.0	10% SDS,open,v=2.0	10% SDS,closed,v=0.125	10% SDS,closed,v=0.25	10% SDS,closed,v=0.5	10% SDS,closed,v=1.0	10% SDS,closed,v=2.0
1% SDS,open,v=0.125		0.999997	0.999998	1.15673e-10	0.00290104	0.999998					10% SDS,open,v=0.125		0.999826	0.540286	0.094897	0.00797272	0.999998	0.999998	0.974773	0.21491	0.0357346
5% SDS,open,v=0.125	0.999997		0.999998	4.82753e-07	0.183452	0.999998					10% SDS,open,v=0.25	0.999826		0.999983	0.969075	0.590956	0.997208	0.999997	0.999998	0.996475	0.867999
10% SDS,open,v=0.125	0.999998	0.999998		3.946e-08	0.060003	0.999998					10% SDS,open,v=0.5	0.540286	0.999983		0.999998	0.999921	0.339503	0.791435	0.999998	0.999998	0.999998
1% SDS,closed,v=0.125	1.15673e-10	4.82753e-07	3.946e-08		0.586281	2.20802e-07					10% SDS,open,v=1.0	0.094897	0.969075	0.999998		0.999998	0.041149	0.231224	0.999739	0.999998	0.999998
5% SDS,closed,v=0.125	0.00290104	0.183452	0.060003	0.586281		0.131832					10% SDS,open,v=2.0	0.00797272	0.590956	0.999921	0.999998		0.00267088	0.0279512	0.931734	0.999998	0.999998
10% SDS,closed,v=0.125	0.999998	0.999998	0.999998	2.20802e-07	0.131832						10% SDS,closed,v=0.125	0.999998	0.997208	0.339503	0.041149	0.00267088		0.999998	0.902476	0.106437	0.0137608
											10% SDS,closed,v=0.25	0.999998	0.999997	0.791435	0.231224	0.0279512	0.999998		0.99803	0.43345	0.103101
	1% SDS,open,v=0.25	5% SDS,open,v=0.25	10% SDS,open,v=0.25	1% SDS,closed,v=0.25	5% SDS,closed,v=0.25	10% SDS,closed,v=0.25					10% SDS,closed,v=0.5	0.974773	0.999998	0.999998	0.999739	0.931734	0.902476	0.99803		0.999994	0.994681
1% SDS,open,v=0.25		0.99965	0.999998	7.64855e-07	0.75709	0.999998					10% SDS,closed,v=1.0	0.21491	0.996475	0.999998	0.999998	0.999998	0.106437	0.43345	0.999994		0.999998
5% SDS,open,v=0.25	0.99965		0.9701	0.00314252	0.999998	0.999998					10% SDS,closed,v=2.0	0.0357346	0.867999	0.999998	0.999998	0.999998	0.0137608	0.103101	0.994681	0.999998
10% SDS,open,v=0.25	0.999998	0.9701		2.54068e-08	0.351721	0.999997					w_1:19
1% SDS,closed,v=0.25	7.64855e-07	0.00314252	2.54068e-08		0.122723	3.78623e-05						5% SDS,open,v=0.125	5% SDS,open,v=0.25	5% SDS,open,v=0.5	5% SDS,open,v=1.0	5% SDS,open,v=2.0	5% SDS,closed,v=0.125	5% SDS,closed,v=0.25	5% SDS,closed,v=0.5	5% SDS,closed,v=1.0	5% SDS,closed,v=2.0
5% SDS,closed,v=0.25	0.75709	0.999998	0.351721	0.122723		0.99137					5% SDS,open,v=0.125		0.999998	0.999998	0.696555	0.108739	0.183452	0.999996	0.999998	0.886379	0.280638
10% SDS,closed,v=0.25	0.999998	0.999998	0.999997	3.78623e-05	0.99137						5% SDS,open,v=0.25	0.999998		0.999996	0.539361	0.0592857	0.293512	0.999998	0.999998	0.773563	0.174063
											5% SDS,open,v=0.5	0.999998	0.999996		0.999176	0.772548	0.00574585	0.942139	0.999998	0.999981	0.947687
	1% SDS,open,v=0.5	5% SDS,open,v=0.5	10% SDS,open,v=0.5	1% SDS,closed,v=0.5	5% SDS,closed,v=0.5	10% SDS,closed,v=0.5					5% SDS,open,v=1.0	0.696555	0.539361	0.999176		0.999998	1.14454e-06	0.0425669	0.972124	0.999998	0.999998
1% SDS,open,v=0.5		0.999389	0.999998	2.20105e-06	0.976531	0.999998					5% SDS,open,v=2.0	0.108739	0.0592857	0.772548	0.999998		2.54155e-09	0.00108292	0.434893	0.999996	0.999998
5% SDS,open,v=0.5	0.999389		0.937814	0.0079724	0.999998	0.999939					5% SDS,closed,v=0.125	0.183452	0.293512	0.00574585	1.14454e-06	2.54155e-09		0.951578	0.0303453	6.93006e-06	3.39107e-08
10% SDS,open,v=0.5	0.999998	0.937814		4.63273e-08	0.700568	0.999998					5% SDS,closed,v=0.25	0.999996	0.999998	0.942139	0.0425669	0.00108292	0.951578		0.997015	0.110972	0.00540476
1% SDS,closed,v=0.5	2.20105e-06	0.0079724	4.63273e-08		0.0401273	6.69171e-06					5% SDS,closed,v=0.5	0.999998	0.999998	0.999998	0.972124	0.434893	0.0303453	0.997015		0.997093	0.726051
5% SDS,closed,v=0.5	0.976531	0.999998	0.700568	0.0401273		0.993935					5% SDS,closed,v=1.0	0.886379	0.773563	0.999981	0.999998	0.999996	6.93006e-06	0.110972	0.997093		0.999998
10% SDS,closed,v=0.5	0.999998	0.999939	0.999998	6.69171e-06	0.993935						5% SDS,closed,v=2.0	0.280638	0.174063	0.947687	0.999998	0.999998	3.39107e-08	0.00540476	0.726051	0.999998
											w_1:99
	1% SDS,open,v=1.0	5% SDS,open,v=1.0	10% SDS,open,v=1.0	1% SDS,closed,v=1.0	5% SDS,closed,v=1.0	10% SDS,closed,v=1.0						1% SDS,open,v=0.125	1% SDS,open,v=0.25	1% SDS,open,v=0.5	1% SDS,open,v=1.0	1% SDS,open,v=2.0	1% SDS,closed,v=0.125	1% SDS,closed,v=0.25	1% SDS,closed,v=0.5	1% SDS,closed,v=1.0	1% SDS,closed,v=2.0
1% SDS,open,v=1.0		0.999989	0.999998	0.06308	0.999462	0.999998					1% SDS,open,v=0.125		0.999998	0.999912	0.586076	0.0486046	1.15673e-10	2.70755e-06	0.00409176	0.999998	0.999994
5% SDS,open,v=1.0	0.999989		0.999985	0.848387	0.999998	0.999998					1% SDS,open,v=0.25	0.999998		0.999994	0.747258	0.0940914	2.15048e-11	7.64855e-07	0.00164754	0.999997	0.999998
10% SDS,open,v=1.0	0.999998	0.999985		0.0584763	0.999305	0.999998					1% SDS,open,v=0.5	0.999912	0.999994		0.999984	0.885926	1.7745e-16	1.05814e-10	2.20105e-06	0.863255	0.999998
1% SDS,closed,v=1.0	0.06308	0.848387	0.0584763		0.962144	0.143576					1% SDS,open,v=1.0	0.586076	0.747258	0.999984		0.999998	0	5.68288e-16	2.16776e-10	0.06308	0.999736
5% SDS,closed,v=1.0	0.999462	0.999998	0.999305	0.962144		0.999984					1% SDS,open,v=2.0	0.0486046	0.0940914	0.885926	0.999998		0	0	3.08551e-14	0.00108915	0.761354
10% SDS,closed,v=1.0	0.999998	0.999998	0.999998	0.143576	0.999984						1% SDS,closed,v=0.125	1.15673e-10	2.15048e-11	1.7745e-16	0	0		0.999924	0.521004	1.11118e-07	1.54525e-15
											1% SDS,closed,v=0.25	2.70755e-06	7.64855e-07	1.05814e-10	5.68288e-16	0	0.999924		0.999944	0.000449685	5.57034e-10
	1% SDS,open,v=2.0	5% SDS,open,v=2.0	10% SDS,open,v=2.0	1% SDS,closed,v=2.0	5% SDS,closed,v=2.0	10% SDS,closed,v=2.0					1% SDS,closed,v=0.5	0.00409176	0.00164754	2.20105e-06	2.16776e-10	3.08551e-14	0.521004	0.999944		0.122753	7.69245e-06
1% SDS,open,v=2.0		0.999945	0.999998	0.761354	0.996748	0.999998					1% SDS,closed,v=1.0	0.999998	0.999997	0.863255	0.06308	0.00108915	1.11118e-07	0.000449685	0.122753		0.9471
5% SDS,open,v=2.0	0.999945		0.999997	0.999997	0.999998	0.999998					1% SDS,closed,v=2.0	0.999994	0.999998	0.999998	0.999736	0.761354	1.54525e-15	5.57034e-10	7.69245e-06	0.9471
10% SDS,open,v=2.0	0.999998	0.999997		0.92345	0.999878	0.999998
1% SDS,closed,v=2.0	0.761354	0.999997	0.92345		0.999998	0.993525
5% SDS,closed,v=2.0	0.996748	0.999998	0.999878	0.999998		0.999998
10% SDS,closed,v=2.0	0.999998	0.999998	0.999998	0.993525	0.999998
snap											snap_1:9
	1% SDS,open,v=0.125	5% SDS,open,v=0.125	10% SDS,open,v=0.125	1% SDS,closed,v=0.125	5% SDS,closed,v=0.125	10% SDS,closed,v=0.125						10% SDS,open,v=0.125	10% SDS,open,v=0.25	10% SDS,open,v=0.5	10% SDS,open,v=1	10% SDS,open,v=2	10% SDS,closed,v=0.125	10% SDS,closed,v=0.25	10% SDS,closed,v=0.5	10% SDS,closed,v=1	10% SDS,closed,v=2
1% SDS,open,v=0.125		0.250405	0.985888	2.86249e-08	0.0148644	0.997272					10% SDS,open,v=0.125		0.999998	0.625113	3.53483e-05	1.26454e-15	0.999998	0.999998	0.331882	0.00010764	6.93131e-14
5% SDS,open,v=0.125	0.250405		0.999993	0.960268	0.986518	0.999998					10% SDS,open,v=0.25	0.999998		0.993014	0.00255996	4.19503e-12	0.999998	0.999998	0.898876	0.0045584	6.93379e-11
10% SDS,open,v=0.125	0.985888	0.999993		0.280606	0.805105	0.999998					10% SDS,open,v=0.5	0.625113	0.993014		0.669843	3.24196e-06	0.87687	0.998763	0.999998	0.645834	8.88906e-06
1% SDS,closed,v=0.125	2.86249e-08	0.960268	0.280606		0.999998	0.0734388					10% SDS,open,v=1	3.53483e-05	0.00255996	0.669843		0.3007	0.000773099	0.0149331	0.99473	0.999998	0.261497
5% SDS,closed,v=0.125	0.0148644	0.986518	0.805105	0.999998		0.536621					10% SDS,open,v=2	1.26454e-15	4.19503e-12	3.24196e-06	0.3007		4.72416e-12	1.2074e-09	0.00121879	0.720056	0.999998
10% SDS,closed,v=0.125	0.997272	0.999998	0.999998	0.0734388	0.536621						10% SDS,closed,v=0.125	0.999998	0.999998	0.87687	0.000773099	4.72416e-12		0.999998	0.235268	1.58333e-05	1.23505e-16
											10% SDS,closed,v=0.25	0.999998	0.999998	0.998763	0.0149331	1.2074e-09	0.999998		0.795053	0.000785115	2.06058e-13
	1% SDS,open,v=0.25	5% SDS,open,v=0.25	10% SDS,open,v=0.25	1% SDS,closed,v=0.25	5% SDS,closed,v=0.25	10% SDS,closed,v=0.25					10% SDS,closed,v=0.5	0.331882	0.898876	0.999998	0.99473	0.00121879	0.235268	0.795053		0.906176	1.83891e-05
1% SDS,open,v=0.25		0.852952	0.999998	7.22135e-08	0.1903	0.999998					10% SDS,closed,v=1	0.00010764	0.0045584	0.645834	0.999998	0.720056	1.58333e-05	0.000785115	0.906176		0.250682
5% SDS,open,v=0.25	0.852952		0.903275	0.643577	0.9953	0.991714					10% SDS,closed,v=2	6.93131e-14	6.93379e-11	8.88906e-06	0.261497	0.999998	1.23505e-16	2.06058e-13	1.83891e-05	0.250682
10% SDS,open,v=0.25	0.999998	0.903275		0.00177396	0.23622	0.999998					snap_1:19
1% SDS,closed,v=0.25	7.22135e-08	0.643577	0.00177396		0.999064	1.82031e-05						5% SDS,open,v=0.125	5% SDS,open,v=0.25	5% SDS,open,v=0.5	5% SDS,open,v=1	5% SDS,open,v=2	5% SDS,closed,v=0.125	5% SDS,closed,v=0.25	5% SDS,closed,v=0.5	5% SDS,closed,v=1	5% SDS,closed,v=2
5% SDS,closed,v=0.25	0.1903	0.9953	0.23622	0.999064		0.036659					5% SDS,open,v=0.125		0.994091	0.0226454	0.00308088	7.94209e-08	0.986518	0.3501	1.00461e-05	5.50329e-06	1.44926e-11
10% SDS,closed,v=0.25	0.999998	0.991714	0.999998	1.82031e-05	0.036659						5% SDS,open,v=0.25	0.994091		0.95129	0.686594	0.00238343	0.999998	0.9953	0.0287561	0.0196239	2.60253e-06
											5% SDS,open,v=0.5	0.0226454	0.95129		0.999998	0.858517	0.950037	0.999998	0.742459	0.970526	0.035391
	1% SDS,open,v=0.5	5% SDS,open,v=0.5	10% SDS,open,v=0.5	1% SDS,closed,v=0.5	5% SDS,closed,v=0.5	10% SDS,closed,v=0.5					5% SDS,open,v=1	0.00308088	0.686594	0.999998		0.990646	0.715805	0.999998	0.999785	0.959729	0.146306
1% SDS,open,v=0.5		0.999972	0.999994	2.82982e-10	0.383568	0.999998					5% SDS,open,v=2	7.94209e-08	0.00238343	0.858517	0.990646		0.00576132	0.591463	0.999998	0.999998	0.93356
5% SDS,open,v=0.5	0.999972		0.717446	0.0142237	0.742459	0.999516					5% SDS,closed,v=0.125	0.986518	0.999998	0.950037	0.715805	0.00576132		0.997825	0.00268987	0.00161666	1.69915e-08
10% SDS,open,v=0.5	0.999994	0.717446		1.54948e-07	0.0181736	0.999998					5% SDS,closed,v=0.25	0.3501	0.9953	0.999998	0.999998	0.591463	0.997825		0.570224	0.477097	0.000495429
1% SDS,closed,v=0.5	2.82982e-10	0.0142237	1.54948e-07		0.65792	2.88017e-09					5% SDS,closed,v=0.5	1.00461e-05	0.0287561	0.742459	0.999785	0.999998	0.00268987	0.570224		0.999998	0.965906
5% SDS,closed,v=0.5	0.383568	0.742459	0.0181736	0.65792		0.0114915					5% SDS,closed,v=1	5.50329e-06	0.0196239	0.970526	0.959729	0.999998	0.00161666	0.477097	0.999998		0.98338
10% SDS,closed,v=0.5	0.999998	0.999516	0.999998	2.88017e-09	0.0114915						5% SDS,closed,v=2	1.44926e-11	2.60253e-06	0.035391	0.146306	0.93356	1.69915e-08	0.000495429	0.965906	0.98338
											snap_1:99
	1% SDS,open,v=1	5% SDS,open,v=1	10% SDS,open,v=1	1% SDS,closed,v=1	5% SDS,closed,v=1	10% SDS,closed,v=1						1% SDS,open,v=0.125	1% SDS,open,v=0.25	1% SDS,open,v=0.5	1% SDS,open,v=1	1% SDS,open,v=2	1% SDS,closed,v=0.125	1% SDS,closed,v=0.25	1% SDS,closed,v=0.5	1% SDS,closed,v=1	1% SDS,closed,v=2
1% SDS,open,v=1		0.999865	0.996161	8.47717e-09	0.999998	0.999994					1% SDS,open,v=0.125		0.708647	4.33184e-06	1.53144e-17	0	2.86249e-08	1.09266e-10	0	0	0
5% SDS,open,v=1	0.999865		0.999998	3.71659e-07	0.959729	0.999998					1% SDS,open,v=0.25	0.708647		0.299806	1.19086e-07	0	0.719865	7.22135e-08	8.82607e-15	0	0
10% SDS,open,v=1	0.996161	0.999998		6.69555e-08	0.99526	0.999998					1% SDS,open,v=0.5	4.33184e-06	0.299806		0.269059	1.50453e-11	0.999998	0.977708	2.82982e-10	1.57092e-13	0
1% SDS,closed,v=1	8.47717e-09	3.71659e-07	6.69555e-08		1.66467e-05	3.92782e-11					1% SDS,open,v=1	1.53144e-17	1.19086e-07	0.269059		0.00602816	0.278061	0.999998	0.752535	8.47717e-09	1.4725e-18
5% SDS,closed,v=1	0.999998	0.959729	0.99526	1.66467e-05		0.992037					1% SDS,open,v=2	0	0	1.50453e-11	0.00602816		3.64018e-10	0.000604567	0.999956	0.999997	4.25145e-09
10% SDS,closed,v=1	0.999994	0.999998	0.999998	3.92782e-11	0.992037						1% SDS,closed,v=0.125	2.86249e-08	0.719865	0.999998	0.278061	3.64018e-10		0.789471	1.64599e-07	2.90923e-18	0
											1% SDS,closed,v=0.25	1.09266e-10	7.22135e-08	0.977708	0.999998	0.000604567	0.789471		0.0501374	2.05501e-08	0
	1% SDS,open,v=2	5% SDS,open,v=2	10% SDS,open,v=2	1% SDS,closed,v=2	5% SDS,closed,v=2	10% SDS,closed,v=2					1% SDS,closed,v=0.5	0	8.82607e-15	2.82982e-10	0.752535	0.999956	1.64599e-07	0.0501374		0.553275	1.73713e-10
1% SDS,open,v=2		0.0190666	0.363415	4.25145e-09	0.997631	0.933876					1% SDS,closed,v=1	0	0	1.57092e-13	8.47717e-09	0.999997	2.90923e-18	2.05501e-08	0.553275		0.00430408
5% SDS,open,v=2	0.0190666		0.999998	7.10796e-15	0.93356	0.999997					1% SDS,closed,v=2	0	0	0	1.4725e-18	4.25145e-09	0	0	1.73713e-10	0.00430408
10% SDS,open,v=2	0.363415	0.999998		1.38458e-11	0.999998	0.999998
1% SDS,closed,v=2	4.25145e-09	7.10796e-15	1.38458e-11		9.36469e-14	3.18949e-16
5% SDS,closed,v=2	0.997631	0.93356	0.999998	9.36469e-14		0.999998
10% SDS,closed,v=2	0.933876	0.999997	0.999998	3.18949e-16	0.999998

## Sheet: F_max, Fig. 4A
1% SDS
	1% SDS,open,v=0.125	1% SDS,open,v=0.25	1% SDS,open,v=0.5	1% SDS,open,v=1.0	1% SDS,open,v=2.0	1% SDS,closed,v=0.125	1% SDS,closed,v=0.25	1% SDS,closed,v=0.5	1% SDS,closed,v=1.0	1% SDS,closed,v=2.0
1% SDS,open,v=0.125		0.999998	0.999785	0.514048	0.0401906	1.43731e-10	2.69663e-06	0.00449346	0.999998	0.999991
1% SDS,open,v=0.25	0.999998		0.999995	0.740084	0.100544	1.41017e-11	4.66539e-07	0.00127673	0.999996	0.999998
1% SDS,open,v=0.5	0.999785	0.999995		0.999979	0.892418	1.12313e-16	5.99034e-11	1.64552e-06	0.843203	0.999998
1% SDS,open,v=1.0	0.514048	0.740084	0.999979		0.999998	0	2.29117e-16	1.28795e-10	0.0526985	0.999532
1% SDS,open,v=2.0	0.0401906	0.100544	0.892418	0.999998		0	0	2.23577e-14	0.000979685	0.74935
1% SDS,closed,v=0.125	1.43731e-10	1.41017e-11	1.12313e-16	0	0		0.999948	0.525336	1.06966e-07	1.37708e-15
1% SDS,closed,v=0.25	2.69663e-06	4.66539e-07	5.99034e-11	2.29117e-16	0	0.999948		0.999924	0.000381444	4.10999e-10
1% SDS,closed,v=0.5	0.00449346	0.00127673	1.64552e-06	1.28795e-10	2.23577e-14	0.525336	0.999924		0.118919	6.98026e-06
1% SDS,closed,v=1.0	0.999998	0.999996	0.843203	0.0526985	0.000979685	1.06966e-07	0.000381444	0.118919		0.945496
1% SDS,closed,v=2.0	0.999991	0.999998	0.999998	0.999532	0.74935	1.37708e-15	4.10999e-10	6.98026e-06	0.945496
5% SDS
	5% SDS,open,v=0.125	5% SDS,open,v=0.25	5% SDS,open,v=0.5	5% SDS,open,v=1.0	5% SDS,open,v=2.0	5% SDS,closed,v=0.125	5% SDS,closed,v=0.25	5% SDS,closed,v=0.5	5% SDS,closed,v=1.0	5% SDS,closed,v=2.0
5% SDS,open,v=0.125		0.999998	0.999998	0.739671	0.104315	0.17996	0.999995	0.999998	0.900818	0.302628
5% SDS,open,v=0.25	0.999998		0.999996	0.572001	0.0533392	0.300466	0.999998	0.999998	0.783294	0.181504
5% SDS,open,v=0.5	0.999998	0.999996		0.999567	0.763313	0.00555566	0.929324	0.999998	0.999988	0.95655
5% SDS,open,v=1.0	0.739671	0.572001	0.999567		0.999998	1.55894e-06	0.0452468	0.975078	0.999998	0.999998
5% SDS,open,v=2.0	0.104315	0.0533392	0.763313	0.999998		2.16883e-09	0.000841615	0.393565	0.999994	0.999998
5% SDS,closed,v=0.125	0.17996	0.300466	0.00555566	1.55894e-06	2.16883e-09		0.959442	0.0340236	8.00977e-06	4.06911e-08
5% SDS,closed,v=0.25	0.999995	0.999998	0.929324	0.0452468	0.000841615	0.959442		0.997009	0.108575	0.00527352
5% SDS,closed,v=0.5	0.999998	0.999998	0.999998	0.975078	0.393565	0.0340236	0.997009		0.996898	0.721877
5% SDS,closed,v=1.0	0.900818	0.783294	0.999988	0.999998	0.999994	8.00977e-06	0.108575	0.996898		0.999998
5% SDS,closed,v=2.0	0.302628	0.181504	0.95655	0.999998	0.999998	4.06911e-08	0.00527352	0.721877	0.999998
10% SDS
	10% SDS,open,v=0.125	10% SDS,open,v=0.25	10% SDS,open,v=0.5	10% SDS,open,v=1.0	10% SDS,open,v=2.0	10% SDS,closed,v=0.125	10% SDS,closed,v=0.25	10% SDS,closed,v=0.5	10% SDS,closed,v=1.0	10% SDS,closed,v=2.0
10% SDS,open,v=0.125		0.99992	0.530945	0.085712	0.00693387	0.999998	0.999998	0.95669	0.265759	0.046278
10% SDS,open,v=0.25	0.99992		0.999955	0.947912	0.513796	0.993228	0.999998	0.999998	0.997283	0.875576
10% SDS,open,v=0.5	0.530945	0.999955		0.999998	0.999894	0.228935	0.85665	0.999998	0.999998	0.999998
10% SDS,open,v=1.0	0.085712	0.947912	0.999998		0.999998	0.0202895	0.283325	0.999874	0.999998	0.999998
10% SDS,open,v=2.0	0.00693387	0.513796	0.999894	0.999998		0.00109272	0.0379533	0.949097	0.999997	0.999998
10% SDS,closed,v=0.125	0.999998	0.993228	0.228935	0.0202895	0.00109272		0.999998	0.75669	0.0849395	0.00970794
10% SDS,closed,v=0.25	0.999998	0.999998	0.85665	0.283325	0.0379533	0.999998		0.998504	0.603352	0.178177
10% SDS,closed,v=0.5	0.95669	0.999998	0.999998	0.999874	0.949097	0.75669	0.998504		0.999998	0.998869
10% SDS,closed,v=1.0	0.265759	0.997283	0.999998	0.999998	0.999997	0.0849395	0.603352	0.999998		0.999998
10% SDS,closed,v=2.0	0.046278	0.875576	0.999998	0.999998	0.999998	0.00970794	0.178177	0.998869	0.999998

## Sheet: F_max, Fig. 4B
	1% SDS,open,v=0.125	5% SDS,open,v=0.125	10% SDS,open,v=0.125	1% SDS,closed,v=0.125	5% SDS,closed,v=0.125	10% SDS,closed,v=0.125
1% SDS,open,v=0.125		0.999997	0.999998	1.43731e-10	0.00366618	0.999997
5% SDS,open,v=0.125	0.999997		0.999998	3.88771e-07	0.17996	0.999998
10% SDS,open,v=0.125	0.999998	0.999998		4.13657e-08	0.0668865	0.999998
1% SDS,closed,v=0.125	1.43731e-10	3.88771e-07	4.13657e-08		0.564404	6.55962e-07
5% SDS,closed,v=0.125	0.00366618	0.17996	0.0668865	0.564404		0.221848
10% SDS,closed,v=0.125	0.999997	0.999998	0.999998	6.55962e-07	0.221848
	1% SDS,open,v=0.25	5% SDS,open,v=0.25	10% SDS,open,v=0.25	1% SDS,closed,v=0.25	5% SDS,closed,v=0.25	10% SDS,closed,v=0.25
1% SDS,open,v=0.25		0.99948	0.999998	4.66539e-07	0.716073	0.999998
5% SDS,open,v=0.25	0.99948		0.982342	0.00259211	0.999998	0.999998
10% SDS,open,v=0.25	0.999998	0.982342		3.3218e-08	0.396701	0.999998
1% SDS,closed,v=0.25	4.66539e-07	0.00259211	3.3218e-08		0.115125	1.7329e-05
5% SDS,closed,v=0.25	0.716073	0.999998	0.396701	0.115125		0.979862
10% SDS,closed,v=0.25	0.999998	0.999998	0.999998	1.7329e-05	0.979862
	1% SDS,open,v=0.5	5% SDS,open,v=0.5	10% SDS,open,v=0.5	1% SDS,closed,v=0.5	5% SDS,closed,v=0.5	10% SDS,closed,v=0.5
1% SDS,open,v=0.5		0.999333	0.999998	1.64552e-06	0.968448	0.999998
5% SDS,open,v=0.5	0.999333		0.946679	0.00676845	0.999998	0.999881
10% SDS,open,v=0.5	0.999998	0.946679		4.33435e-08	0.692856	0.999998
1% SDS,closed,v=0.5	1.64552e-06	0.00676845	4.33435e-08		0.0401675	3.93377e-06
5% SDS,closed,v=0.5	0.968448	0.999998	0.692856	0.0401675		0.98782
10% SDS,closed,v=0.5	0.999998	0.999881	0.999998	3.93377e-06	0.98782
	1% SDS,open,v=1.0	5% SDS,open,v=1.0	10% SDS,open,v=1.0	1% SDS,closed,v=1.0	5% SDS,closed,v=1.0	10% SDS,closed,v=1.0
1% SDS,open,v=1.0		0.999965	0.999998	0.0526985	0.998985	0.999998
5% SDS,open,v=1.0	0.999965		0.99997	0.864181	0.999998	0.999998
10% SDS,open,v=1.0	0.999998	0.99997		0.0546145	0.999093	0.999998
1% SDS,closed,v=1.0	0.0526985	0.864181	0.0546145		0.963021	0.188322
5% SDS,closed,v=1.0	0.998985	0.999998	0.999093	0.963021		0.999995
10% SDS,closed,v=1.0	0.999998	0.999998	0.999998	0.188322	0.999995
	1% SDS,open,v=2.0	5% SDS,open,v=2.0	10% SDS,open,v=2.0	1% SDS,closed,v=2.0	5% SDS,closed,v=2.0	10% SDS,closed,v=2.0
1% SDS,open,v=2.0		0.999958	0.999998	0.74935	0.995827	0.999998
5% SDS,open,v=2.0	0.999958		0.999997	0.999997	0.999998	0.999998
10% SDS,open,v=2.0	0.999998	0.999997		0.917667	0.999828	0.999998
1% SDS,closed,v=2.0	0.74935	0.999997	0.917667		0.999998	0.997087
5% SDS,closed,v=2.0	0.995827	0.999998	0.999828	0.999998		0.999998
10% SDS,closed,v=2.0	0.999998	0.999998	0.999998	0.997087	0.999998

## Sheet: W_max, Fig. 1A, Appendix 1
1% SDS
	1% SDS,open,v=0.125	1% SDS,open,v=0.25	1% SDS,open,v=0.5	1% SDS,open,v=1.0	1% SDS,open,v=2.0	1% SDS,closed,v=0.125	1% SDS,closed,v=0.25	1% SDS,closed,v=0.5	1% SDS,closed,v=1.0	1% SDS,closed,v=2.0
1% SDS,open,v=0.125		0.999998	0.999912	0.586076	0.0486046	1.15673e-10	2.70755e-06	0.00409176	0.999998	0.999994
1% SDS,open,v=0.25	0.999998		0.999994	0.747258	0.0940914	2.15048e-11	7.64855e-07	0.00164754	0.999997	0.999998
1% SDS,open,v=0.5	0.999912	0.999994		0.999984	0.885926	1.7745e-16	1.05814e-10	2.20105e-06	0.863255	0.999998
1% SDS,open,v=1.0	0.586076	0.747258	0.999984		0.999998	0	5.68288e-16	2.16776e-10	0.06308	0.999736
1% SDS,open,v=2.0	0.0486046	0.0940914	0.885926	0.999998		0	0	3.08551e-14	0.00108915	0.761354
1% SDS,closed,v=0.125	1.15673e-10	2.15048e-11	1.7745e-16	0	0		0.999924	0.521004	1.11118e-07	1.54525e-15
1% SDS,closed,v=0.25	2.70755e-06	7.64855e-07	1.05814e-10	5.68288e-16	0	0.999924		0.999944	0.000449685	5.57034e-10
1% SDS,closed,v=0.5	0.00409176	0.00164754	2.20105e-06	2.16776e-10	3.08551e-14	0.521004	0.999944		0.122753	7.69245e-06
1% SDS,closed,v=1.0	0.999998	0.999997	0.863255	0.06308	0.00108915	1.11118e-07	0.000449685	0.122753		0.9471
1% SDS,closed,v=2.0	0.999994	0.999998	0.999998	0.999736	0.761354	1.54525e-15	5.57034e-10	7.69245e-06	0.9471
5% SDS
	5% SDS,open,v=0.125	5% SDS,open,v=0.25	5% SDS,open,v=0.5	5% SDS,open,v=1.0	5% SDS,open,v=2.0	5% SDS,closed,v=0.125	5% SDS,closed,v=0.25	5% SDS,closed,v=0.5	5% SDS,closed,v=1.0	5% SDS,closed,v=2.0
5% SDS,open,v=0.125		0.999998	0.999998	0.696555	0.108739	0.183452	0.999996	0.999998	0.886379	0.280638
5% SDS,open,v=0.25	0.999998		0.999996	0.539361	0.0592857	0.293512	0.999998	0.999998	0.773563	0.174063
5% SDS,open,v=0.5	0.999998	0.999996		0.999176	0.772548	0.00574585	0.942139	0.999998	0.999981	0.947687
5% SDS,open,v=1.0	0.696555	0.539361	0.999176		0.999998	1.14454e-06	0.0425669	0.972124	0.999998	0.999998
5% SDS,open,v=2.0	0.108739	0.0592857	0.772548	0.999998		2.54155e-09	0.00108292	0.434893	0.999996	0.999998
5% SDS,closed,v=0.125	0.183452	0.293512	0.00574585	1.14454e-06	2.54155e-09		0.951578	0.0303453	6.93006e-06	3.39107e-08
5% SDS,closed,v=0.25	0.999996	0.999998	0.942139	0.0425669	0.00108292	0.951578		0.997015	0.110972	0.00540476
5% SDS,closed,v=0.5	0.999998	0.999998	0.999998	0.972124	0.434893	0.0303453	0.997015		0.997093	0.726051
5% SDS,closed,v=1.0	0.886379	0.773563	0.999981	0.999998	0.999996	6.93006e-06	0.110972	0.997093		0.999998
5% SDS,closed,v=2.0	0.280638	0.174063	0.947687	0.999998	0.999998	3.39107e-08	0.00540476	0.726051	0.999998
10% SDS
	10% SDS,open,v=0.125	10% SDS,open,v=0.25	10% SDS,open,v=0.5	10% SDS,open,v=1.0	10% SDS,open,v=2.0	10% SDS,closed,v=0.125	10% SDS,closed,v=0.25	10% SDS,closed,v=0.5	10% SDS,closed,v=1.0	10% SDS,closed,v=2.0
10% SDS,open,v=0.125		0.999826	0.540286	0.094897	0.00797272	0.999998	0.999998	0.974773	0.21491	0.0357346
10% SDS,open,v=0.25	0.999826		0.999983	0.969075	0.590956	0.997208	0.999997	0.999998	0.996475	0.867999
10% SDS,open,v=0.5	0.540286	0.999983		0.999998	0.999921	0.339503	0.791435	0.999998	0.999998	0.999998
10% SDS,open,v=1.0	0.094897	0.969075	0.999998		0.999998	0.041149	0.231224	0.999739	0.999998	0.999998
10% SDS,open,v=2.0	0.00797272	0.590956	0.999921	0.999998		0.00267088	0.0279512	0.931734	0.999998	0.999998
10% SDS,closed,v=0.125	0.999998	0.997208	0.339503	0.041149	0.00267088		0.999998	0.902476	0.106437	0.0137608
10% SDS,closed,v=0.25	0.999998	0.999997	0.791435	0.231224	0.0279512	0.999998		0.99803	0.43345	0.103101
10% SDS,closed,v=0.5	0.974773	0.999998	0.999998	0.999739	0.931734	0.902476	0.99803		0.999994	0.994681
10% SDS,closed,v=1.0	0.21491	0.996475	0.999998	0.999998	0.999998	0.106437	0.43345	0.999994		0.999998
10% SDS,closed,v=2.0	0.0357346	0.867999	0.999998	0.999998	0.999998	0.0137608	0.103101	0.994681	0.999998

## Sheet: W_max, Fig. 1B, Appendix 1
	1% SDS,open,v=0.125	5% SDS,open,v=0.125	10% SDS,open,v=0.125	1% SDS,closed,v=0.125	5% SDS,closed,v=0.125	10% SDS,closed,v=0.125
1% SDS,open,v=0.125		0.999997	0.999998	1.15673e-10	0.00290104	0.999998
5% SDS,open,v=0.125	0.999997		0.999998	4.82753e-07	0.183452	0.999998
10% SDS,open,v=0.125	0.999998	0.999998		3.946e-08	0.060003	0.999998
1% SDS,closed,v=0.125	1.15673e-10	4.82753e-07	3.946e-08		0.586281	2.20802e-07
5% SDS,closed,v=0.125	0.00290104	0.183452	0.060003	0.586281		0.131832
10% SDS,closed,v=0.125	0.999998	0.999998	0.999998	2.20802e-07	0.131832
	1% SDS,open,v=0.25	5% SDS,open,v=0.25	10% SDS,open,v=0.25	1% SDS,closed,v=0.25	5% SDS,closed,v=0.25	10% SDS,closed,v=0.25
1% SDS,open,v=0.25		0.99965	0.999998	7.64855e-07	0.75709	0.999998
5% SDS,open,v=0.25	0.99965		0.9701	0.00314252	0.999998	0.999998
10% SDS,open,v=0.25	0.999998	0.9701		2.54068e-08	0.351721	0.999997
1% SDS,closed,v=0.25	7.64855e-07	0.00314252	2.54068e-08		0.122723	3.78623e-05
5% SDS,closed,v=0.25	0.75709	0.999998	0.351721	0.122723		0.99137
10% SDS,closed,v=0.25	0.999998	0.999998	0.999997	3.78623e-05	0.99137
	1% SDS,open,v=0.5	5% SDS,open,v=0.5	10% SDS,open,v=0.5	1% SDS,closed,v=0.5	5% SDS,closed,v=0.5	10% SDS,closed,v=0.5
1% SDS,open,v=0.5		0.999389	0.999998	2.20105e-06	0.976531	0.999998
5% SDS,open,v=0.5	0.999389		0.937814	0.0079724	0.999998	0.999939
10% SDS,open,v=0.5	0.999998	0.937814		4.63273e-08	0.700568	0.999998
1% SDS,closed,v=0.5	2.20105e-06	0.0079724	4.63273e-08		0.0401273	6.69171e-06
5% SDS,closed,v=0.5	0.976531	0.999998	0.700568	0.0401273		0.993935
10% SDS,closed,v=0.5	0.999998	0.999939	0.999998	6.69171e-06	0.993935
	1% SDS,open,v=1.0	5% SDS,open,v=1.0	10% SDS,open,v=1.0	1% SDS,closed,v=1.0	5% SDS,closed,v=1.0	10% SDS,closed,v=1.0
1% SDS,open,v=1.0		0.999989	0.999998	0.06308	0.999462	0.999998
5% SDS,open,v=1.0	0.999989		0.999985	0.848387	0.999998	0.999998
10% SDS,open,v=1.0	0.999998	0.999985		0.0584763	0.999305	0.999998
1% SDS,closed,v=1.0	0.06308	0.848387	0.0584763		0.962144	0.143576
5% SDS,closed,v=1.0	0.999462	0.999998	0.999305	0.962144		0.999984
10% SDS,closed,v=1.0	0.999998	0.999998	0.999998	0.143576	0.999984
	1% SDS,open,v=2.0	5% SDS,open,v=2.0	10% SDS,open,v=2.0	1% SDS,closed,v=2.0	5% SDS,closed,v=2.0	10% SDS,closed,v=2.0
1% SDS,open,v=2.0		0.999945	0.999998	0.761354	0.996748	0.999998
5% SDS,open,v=2.0	0.999945		0.999997	0.999997	0.999998	0.999998
10% SDS,open,v=2.0	0.999998	0.999997		0.92345	0.999878	0.999998
1% SDS,closed,v=2.0	0.761354	0.999997	0.92345		0.999998	0.993525
5% SDS,closed,v=2.0	0.996748	0.999998	0.999878	0.999998		0.999998
10% SDS,closed,v=2.0	0.999998	0.999998	0.999998	0.993525	0.999998

## Sheet: snap, Fig. 5A
1% SDS
	1% SDS,open,v=0.125	1% SDS,open,v=0.25	1% SDS,open,v=0.5	1% SDS,open,v=1	1% SDS,open,v=2	1% SDS,closed,v=0.125	1% SDS,closed,v=0.25	1% SDS,closed,v=0.5	1% SDS,closed,v=1	1% SDS,closed,v=2
1% SDS,open,v=0.125		0.708647	4.33184e-06	1.53144e-17	0	2.86249e-08	1.09266e-10	0	0	0
1% SDS,open,v=0.25	0.708647		0.299806	1.19086e-07	0	0.719865	7.22135e-08	8.82607e-15	0	0
1% SDS,open,v=0.5	4.33184e-06	0.299806		0.269059	1.50453e-11	0.999998	0.977708	2.82982e-10	1.57092e-13	0
1% SDS,open,v=1	1.53144e-17	1.19086e-07	0.269059		0.00602816	0.278061	0.999998	0.752535	8.47717e-09	1.4725e-18
1% SDS,open,v=2	0	0	1.50453e-11	0.00602816		3.64018e-10	0.000604567	0.999956	0.999997	4.25145e-09
1% SDS,closed,v=0.125	2.86249e-08	0.719865	0.999998	0.278061	3.64018e-10		0.789471	1.64599e-07	2.90923e-18	0
1% SDS,closed,v=0.25	1.09266e-10	7.22135e-08	0.977708	0.999998	0.000604567	0.789471		0.0501374	2.05501e-08	0
1% SDS,closed,v=0.5	0	8.82607e-15	2.82982e-10	0.752535	0.999956	1.64599e-07	0.0501374		0.553275	1.73713e-10
1% SDS,closed,v=1	0	0	1.57092e-13	8.47717e-09	0.999997	2.90923e-18	2.05501e-08	0.553275		0.00430408
1% SDS,closed,v=2	0	0	0	1.4725e-18	4.25145e-09	0	0	1.73713e-10	0.00430408
5% SDS
	5% SDS,open,v=0.125	5% SDS,open,v=0.25	5% SDS,open,v=0.5	5% SDS,open,v=1	5% SDS,open,v=2	5% SDS,closed,v=0.125	5% SDS,closed,v=0.25	5% SDS,closed,v=0.5	5% SDS,closed,v=1	5% SDS,closed,v=2
5% SDS,open,v=0.125		0.994091	0.0226454	0.00308088	7.94209e-08	0.986518	0.3501	1.00461e-05	5.50329e-06	1.44926e-11
5% SDS,open,v=0.25	0.994091		0.95129	0.686594	0.00238343	0.999998	0.9953	0.0287561	0.0196239	2.60253e-06
5% SDS,open,v=0.5	0.0226454	0.95129		0.999998	0.858517	0.950037	0.999998	0.742459	0.970526	0.035391
5% SDS,open,v=1	0.00308088	0.686594	0.999998		0.990646	0.715805	0.999998	0.999785	0.959729	0.146306
5% SDS,open,v=2	7.94209e-08	0.00238343	0.858517	0.990646		0.00576132	0.591463	0.999998	0.999998	0.93356
5% SDS,closed,v=0.125	0.986518	0.999998	0.950037	0.715805	0.00576132		0.997825	0.00268987	0.00161666	1.69915e-08
5% SDS,closed,v=0.25	0.3501	0.9953	0.999998	0.999998	0.591463	0.997825		0.570224	0.477097	0.000495429
5% SDS,closed,v=0.5	1.00461e-05	0.0287561	0.742459	0.999785	0.999998	0.00268987	0.570224		0.999998	0.965906
5% SDS,closed,v=1	5.50329e-06	0.0196239	0.970526	0.959729	0.999998	0.00161666	0.477097	0.999998		0.98338
5% SDS,closed,v=2	1.44926e-11	2.60253e-06	0.035391	0.146306	0.93356	1.69915e-08	0.000495429	0.965906	0.98338
10% SDS
	10% SDS,open,v=0.125	10% SDS,open,v=0.25	10% SDS,open,v=0.5	10% SDS,open,v=1	10% SDS,open,v=2	10% SDS,closed,v=0.125	10% SDS,closed,v=0.25	10% SDS,closed,v=0.5	10% SDS,closed,v=1	10% SDS,closed,v=2
10% SDS,open,v=0.125		0.999998	0.625113	3.53483e-05	1.26454e-15	0.999998	0.999998	0.331882	0.00010764	6.93131e-14
10% SDS,open,v=0.25	0.999998		0.993014	0.00255996	4.19503e-12	0.999998	0.999998	0.898876	0.0045584	6.93379e-11
10% SDS,open,v=0.5	0.625113	0.993014		0.669843	3.24196e-06	0.87687	0.998763	0.999998	0.645834	8.88906e-06
10% SDS,open,v=1	3.53483e-05	0.00255996	0.669843		0.3007	0.000773099	0.0149331	0.99473	0.999998	0.261497
10% SDS,open,v=2	1.26454e-15	4.19503e-12	3.24196e-06	0.3007		4.72416e-12	1.2074e-09	0.00121879	0.720056	0.999998
10% SDS,closed,v=0.125	0.999998	0.999998	0.87687	0.000773099	4.72416e-12		0.999998	0.235268	1.58333e-05	1.23505e-16
10% SDS,closed,v=0.25	0.999998	0.999998	0.998763	0.0149331	1.2074e-09	0.999998		0.795053	0.000785115	2.06058e-13
10% SDS,closed,v=0.5	0.331882	0.898876	0.999998	0.99473	0.00121879	0.235268	0.795053		0.906176	1.83891e-05
10% SDS,closed,v=1	0.00010764	0.0045584	0.645834	0.999998	0.720056	1.58333e-05	0.000785115	0.906176		0.250682
10% SDS,closed,v=2	6.93131e-14	6.93379e-11	8.88906e-06	0.261497	0.999998	1.23505e-16	2.06058e-13	1.83891e-05	0.250682

## Sheet: snap, Fig. 5B
	1% SDS,open,v=0.125	5% SDS,open,v=0.125	10% SDS,open,v=0.125	1% SDS,closed,v=0.125	5% SDS,closed,v=0.125	10% SDS,closed,v=0.125
1% SDS,open,v=0.125		0.250405	0.985888	2.86249e-08	0.0148644	0.997272
5% SDS,open,v=0.125	0.250405		0.999993	0.960268	0.986518	0.999998
10% SDS,open,v=0.125	0.985888	0.999993		0.280606	0.805105	0.999998
1% SDS,closed,v=0.125	2.86249e-08	0.960268	0.280606		0.999998	0.0734388
5% SDS,closed,v=0.125	0.0148644	0.986518	0.805105	0.999998		0.536621
10% SDS,closed,v=0.125	0.997272	0.999998	0.999998	0.0734388	0.536621
	1% SDS,open,v=0.25	5% SDS,open,v=0.25	10% SDS,open,v=0.25	1% SDS,closed,v=0.25	5% SDS,closed,v=0.25	10% SDS,closed,v=0.25
1% SDS,open,v=0.25		0.852952	0.999998	7.22135e-08	0.1903	0.999998
5% SDS,open,v=0.25	0.852952		0.903275	0.643577	0.9953	0.991714
10% SDS,open,v=0.25	0.999998	0.903275		0.00177396	0.23622	0.999998
1% SDS,closed,v=0.25	7.22135e-08	0.643577	0.00177396		0.999064	1.82031e-05
5% SDS,closed,v=0.25	0.1903	0.9953	0.23622	0.999064		0.036659
10% SDS,closed,v=0.25	0.999998	0.991714	0.999998	1.82031e-05	0.036659
	1% SDS,open,v=0.5	5% SDS,open,v=0.5	10% SDS,open,v=0.5	1% SDS,closed,v=0.5	5% SDS,closed,v=0.5	10% SDS,closed,v=0.5
1% SDS,open,v=0.5		0.999972	0.999994	2.82982e-10	0.383568	0.999998
5% SDS,open,v=0.5	0.999972		0.717446	0.0142237	0.742459	0.999516
10% SDS,open,v=0.5	0.999994	0.717446		1.54948e-07	0.0181736	0.999998
1% SDS,closed,v=0.5	2.82982e-10	0.0142237	1.54948e-07		0.65792	2.88017e-09
5% SDS,closed,v=0.5	0.383568	0.742459	0.0181736	0.65792		0.0114915
10% SDS,closed,v=0.5	0.999998	0.999516	0.999998	2.88017e-09	0.0114915
	1% SDS,open,v=1	5% SDS,open,v=1	10% SDS,open,v=1	1% SDS,closed,v=1	5% SDS,closed,v=1	10% SDS,closed,v=1
1% SDS,open,v=1		0.999865	0.996161	8.47717e-09	0.999998	0.999994
5% SDS,open,v=1	0.999865		0.999998	3.71659e-07	0.959729	0.999998
10% SDS,open,v=1	0.996161	0.999998		6.69555e-08	0.99526	0.999998
1% SDS,closed,v=1	8.47717e-09	3.71659e-07	6.69555e-08		1.66467e-05	3.92782e-11
5% SDS,closed,v=1	0.999998	0.959729	0.99526	1.66467e-05		0.992037
10% SDS,closed,v=1	0.999994	0.999998	0.999998	3.92782e-11	0.992037
	1% SDS,open,v=2	5% SDS,open,v=2	10% SDS,open,v=2	1% SDS,closed,v=2	5% SDS,closed,v=2	10% SDS,closed,v=2
1% SDS,open,v=2		0.0190666	0.363415	4.25145e-09	0.997631	0.933876
5% SDS,open,v=2	0.0190666		0.999998	7.10796e-15	0.93356	0.999997
10% SDS,open,v=2	0.363415	0.999998		1.38458e-11	0.999998	0.999998
1% SDS,closed,v=2	4.25145e-09	7.10796e-15	1.38458e-11		9.36469e-14	3.18949e-16
5% SDS,closed,v=2	0.997631	0.93356	0.999998	9.36469e-14		0.999998
10% SDS,closed,v=2	0.933876	0.999997	0.999998	3.18949e-16	0.999998
